# Supplementary material for: Muscle ring finger-3 protects against diabetic cardiomyopathy induced by a high fat diet
Source: Springer Nature journal article supplement (doi:10.1186/s12902-015-0028-z), 2015-07-27
Supplement: MOESM4 [file 9753906]

## A Enrichment Analysis by Location

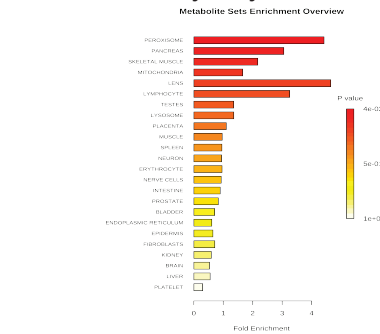

## B Pathway Analysis

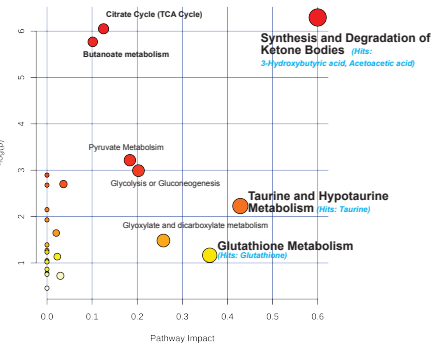

| Metabolite Set | Total Hits | Expected | p value | Holm P | Details |                                                                   |
|----------------|------------|----------|---------|--------|---------|-------------------------------------------------------------------|
| PEROXISOME     | 37         | 5        | 1.13    | 0.0039 | 0.222   | Pyruvic acid, Sarcosine, Oxalic Acid, Taurine, Xanthine           |
| PANCREAS       | 32         | 3        | 0.981   | 0.0699 | 1       | Oxalic Acid, Inosine, Oleic Acid                                  |
| SKELTAL MUSCLE | 45         | 3        | 1.38    | 0.154  | 1       | Xanthine, Oleic Acid, Sarcosine                                   |
| MITOCHONDRIA   | 98         | 5        | 3.01    | 0.17   | 1       | Glutathione, Adenosine, Pantothenic Acid, Pyruvic Acid, Sarcosine |

### Overview

## C Enrichment by Disease-Associated Metabolite Sets

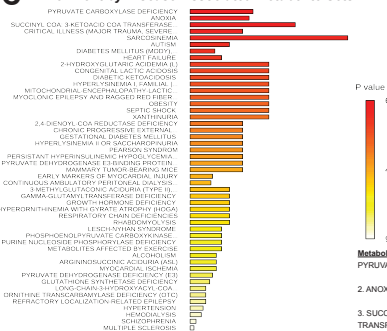

| Metabolite Set                                                           | Total Hits | Expected | p Value | Holm P  | FDR   | Details                                                       |
|--------------------------------------------------------------------------|------------|----------|---------|---------|-------|---------------------------------------------------------------|
| 1. PYRUVATE CARBOXYLASE DEFICIENCY                                       | 4          | 4        | 5.16E-4 | 0.177   | 0.177 | 3-Hydroxybutyric acid, Acetoacetic acid, Pyruvic acid, Lysine |
| 2. ANOXIA                                                                | 8          | 3        | 0.355   | 0.00368 | 1.0   | 0.63 3-Hydroxybutyric acid, Acetoacetic acid, Pyruvic acid    |
| 3. SUCCINYL COA:3-KETOACID COA TRANSFERASE DEFICIENCY                    | 3          | 2        | 0.133   | 0.00549 | 1.0   | 0.63 3-Hydroxybutyric acid, Acetoacetic acid                  |
| 4. CRITICAL ILLNESS (MAJOR TRAUMA, SEVERE SEPTIC OR (CARDIOGENIC SHOCK)) | 6          | 2        | 0.266   | 0.0253  | 1.0   | 1.0 Adenosine, Inosine                                        |
| 5. AUTISM                                                                | 8          | 2        | 0.355   | 0.0447  | 1.0   | 1.0 Adenosine, Glutathione                                    |
| 6. DIABETES MELLITUS (MODY), NON-INSULIN-DEPENDENT                       | 19         | 3        | 0.843   | 0.0463  | 1.0   | 1.0 Citric acid, 3-Hydroxybutyric acid, Taurine               |
| 8. HEART FAILURE                                                         | 10         | 2        | 0.444   | 0.0681  | 1.0   | 1.0 Taurine, 3-Hydroxybutyric acid                            |

Figure 8.
